# Supplementary material
Source: publisher site journal article supplement (https://spandidos-publications.com/3992/downloadSupplementary)
Supplement: Supplementary file 1 [file downloadSupplementary]

## Sheet: Sheet1
Table SI. Venn plot analysis results of differentially expressed genes amongst three datasets.
A, Differentially expressed genes identified from GSE39645, GSE54934 and GSE56597 datasets (n=1,386)
Gene names
CLMP
CREB3L1
ERCC5
BBOX1
CXCR4
CADM4
ERG
PDE1C
SORL1
RPS6KA5
SLC12A4
BMP3
SLCO2B1
BBS12
LARP7
gpr160
AP1S2
PDCD4
CCL19
GCC2
PIRT
SAMSN1
ID1
MMP15
NPR1
ASS1
RGS4
ADAM23
DDHD2
PPBP
MAN2B1
GNG12
FHL1
CHMP2B
BTK
KRCC1
TFEC
DCX
FHDC1
RDX
PAWR
ARHGEF26
TAB2
TANC2
HLA-DOA
NTN4
CD177
cyp4f3
HERC6
CASP1
XAF1
CASC10
AQP11
IFNAR1
NEGR1
TLR5
ERMARD
RABGGTB
ARSK
NDUFAF1
EPB41L3
WSB1
PROS1
ZBTB41
ZBTB7C
ITGA2
ADCYAP1R1
CDH20
CFAP20
ABI3
RERGL
KLHDC1
ATL1
ADGRG1
PLBD2
OBSL1
OGFRL1
FCGR2A
NLGN4X
LRRC32
EMB
TUBB2B
TCEAL2
CTNNA1
siglec10
NTRK2
MFGE8
SH3TC2
PDLIM1
EFL1
ALOX5AP
OLFM4
PADI4
MDM2
ABCA6
EGFR
SESN1
NCAM2
ERBB2
unc93b1
TAGLN3
TMEM43
OAS2
DEGS1
CPA3
PVALB
HCFC2
atf7ip2
SLC16A4
ERBIN
RAD50
MTHFD1L
WDR44
HRH1
SPANXA1
SYT11
SPATA31C1
HDAC11
DHX29
SLC15A3
ADIRF
HEY1
FGF10
SDC3
SYNJ2BP
TRPM3
SLC7A7
ADAP2
SLC1A3
LPL
CD84
CLEC5A
LRG1
SLC46A3
DMD
ADCY2
CDH19
SHTN1
CAV2
IGSF6
PDCD1LG2
CTSO
UPF2
C1QA
TERF1
TREM1
SLIT2
KCNMB4
SERPINA3
FBXL4
BMP2K
UGT8
DYNLT3
SLC4A4
CHPF
AOX1
EEA1
LY96
IL1R1
HEPACAM
RRAGB
RCN2
MEDAG
st6galnac2
PLXNA3
ORC3
HSPB6
CHRDL1
LAMA2
RENBP
C1QC
POLI
DEPDC7
DSP
cxorf21
GPR137B
NOS1
ADGRG3
RERG
CNTN4
PLEKHB1
ACBD5
IPO8
INSC
MRAP2
UBLCP1
APOL4
ANKRD28
CXCR2
RNASE2
VSNL1
GSAP
EXOSC10
MAL
AQP4
FADS2
ATP2C1
CD58
SELE
EXOSC9
KIAA0196
FAM188A
THBD
ABCA8
EYA1
SERPINB2
SMPD1
STC1
c10orf11
PLA2G4A
HLA-DMB
EDNRB
SCD
FAM229B
SYNJ2
CAPG
ST3GAL6
ROBO1
PCNX4
VPS11
SIPA1L1
OXR1
SLC30A4
KCNK1
MCAM
CDH6
KLHL4
SFN
CLMN
PTX3
RCAN3
SGMS1
TMEM63B
C7
S100A8
MR1
LIX1
OASL
ACTN2
TLR3
PTAR1
CSRNP3
GLMP
GAPT
ISG15
WDR47
MGAM
ETNPPL
BTBD3
EPHA3
H2AFJ
EDIL3
SLU7
FAM105A
DUSP6
ADGRB3
TGFB3
FAM65B
TPP1
prb1
ZNF766
TP53INP1
ak5
HTATIP2
GPR34
RBM11
ADGRL3
SHROOM3
TRIM38
p2ry12
CXCL1
PDZRN4
plxdc2
BTN3A3
BEX1
MAP2
FLRT2
RHBDF2
ETAA1
DSCR3
AQP1
KIF13B
ITFG1
apoc1
TTYH1
GBP3
RBMS3
SSX4B
IFNGR1
MATN2
ARHGEF6
IL33
tmem245
COBL
GAS7
CTNNAL1
PTBP2
FABP4
APOBEC3G
GPX3
NOV
gaa
GPM6B
KYAT3
ANK3
SIX1
SHC4
SNX24
CTSH
ALDH3B1
THSD4
POPDC3
GATM
RASA3
ctsg
RND1
TNR
SCN9A
PAK2
MS4A14
KLHL24
ITPR3
BIRC3
TRAPPC6B
FIBIN
ITPK1
POLK
CHRM5
FXYD6
HLA-DRB5
CASP6
FRY
DKK2
TLR1
CLN5
C15orf52
FAM63B
TSPAN13
GHR
SERPINB9
LAIR1
EVI2A
C3
GJB1
ATAD1
ZNF25
MFSD11
ASCC1
TPCN1
STARD13
PCBP4
ADI1
SLC35D2
PPP1R9A
DAO
EDNRA
PENK
SMAD9
CNTFR
CLSTN2
LGI4
MFAP5
Pramef5
FCGBP
GALNT18
MGST1
FRYL
DCSTAMP
MTR
PLXNB3
TMEM140
SH3D19
CAPN6
RASSF4
S100A3
MRPS28
SVEP1
NEDD4L
PDGFD
BVES
ANKRD22
SELP
SPP1
GLI1
ENO2
BMP7
HPGDS
COX7B
ADH1C
HAS2
RUNX1T1
ZFP90
S100B
ARHGAP12
SCCPDH
TNFRSF19
pcdh20
SCFD1
ITGB8
GAP43
PDE3A
TRIM14
DOCK4
FRMD4A
PIGK
DAG1
MIA
FIGN
PYROXD1
arhgap24
ZFAND6
CD86
BROX
AGA
GFRA2
WWP1
TMEM62
POGLUT1
RGS1
PARP8
EFEMP1
MYO1E
GPR155
oxtr
ZC4H2
ME2
ERAP2
c20orf194
mocs2
CHRNA6
PLCH1
FAM102A
TBCE
PLAT
C8orf46
PPFIA2
THBS4
CHI3L2
SRPX2
LYVE1
RAB3GAP2
STEAP1B
UFSP2
SELPLG
AP1B1
FEZ1
DENND6A
SCN1B
EBF2
CYBB
UXS1
SEMA6D
TBX18
FGF5
CELF2
LRRC8B
TFPI
SLITRK2
BBS5
NRIP2
CYB5R2
FLRT3
ADAMTS3
TBC1D7
TM4SF1
AKR1C1
PALD1
LAMP2
CAT
APH1B
SMCO3
F5
C12orf56
ACP6
FXYD1
CLDN1
TDRD7
KCND2
FCER1G
SLC24A3
TXNL4B
SHOX2
CCDC159
DHX58
FBXO28
TMTC1
NRK
CTTNBP2NL
PEAR1
HAVCR2
BHLHE41
CFD
TMEM176B
SOX2
KAT2B
AS3MT
CD1C
IQGAP2
RBP5
OTUD1
NFE2
S100P
MSC
DCK
DOCK2
SYNPO2
FPR3
AKAP7
ASCC3
TMEM86A
ACAT1
MEOX1
CARD11
FBN2
PLA2G2A
FRRS1L
MOSPD2
c2orf40
LMBRD1
DTX3L
SCIN
LRRC17
ZNF665
lipA
KIF16B
RAB11FIP2
CDH2
SIPA1L2
RCAN2
PPARG
PQLC2L
DSG2
EVI5
HSPA4L
RASGEF1C
CXCL8
PARP14
TOM1L2
kif1bp
USP9X
IFIT2
NEK7
olfml1
SLC19A3
HIST3H2A
STEAP4
CDK6
SNAP25
csnk1g3
AKTIP
GAS2L3
cep350
CADPS
WARS
LPCAT2
FGFR2
ASPA
DDX60
CHUK
SPATA6
TBXAS1
INTS10
SLPI
CNTNAP4
DRAM1
c3orf52
PLEKHA1
OSTM1
NAPEPLD
RND3
MTMR10
PLEKHH2
SEMA3B
GRB14
SEMA4B
TYRO3
DHRS3
hla-dqa1
PDE1A
DCTN6
MX2
SEL1L
TRAPPC13
PLIN1
sned1
PHACTR4
P2RY13
uba7
SYT1
KCNT2
SCAPER
HSPA13
IKZF2
TLE1
STXBP5L
FAP
SCARA5
PRG4
INHBA
slc2a5
CFI
PLD4
CALU
LIMCH1
CCNG1
IFI30
PRKD1
ICAM1
SCARB2
ADK
THBS2
CRYZ
GATB
Krtap6-3
ANPEP
FAM26E
fam149a
CYLD
MGAT4A
APOBEC3C
CTDSPL
ARID4A
APCDD1
OSBPL11
CCL21
MSTN
PRAMEF4
RSAD2
RGS6
ETV5
PPP1R1C
P2RX4
CCND2
CFB
PCP4
PDLIM3
CSF2RA
IRF8
ZNF654
MICALL2
SPATA13
NUDT5
SEMA5A
PI16
FREM1
DNER
ETFRF1
KDM3A
MLPH
NRG1
SPINT2
HSPG2
ABHD6
GCNT1
ANO6
RFTN2
ADIPOQ
ABCA3
GLT1D1
NHLRC3
EPB41L4B
RDH10
AQP9
MET
TNS3
LRRN1
LHFPL2
ITGA3
KIAA1033
LPAR4
TIGAR
ANXA3
CLC
GAGE1
C1QTNF3
VGLL3
GFPT2
BORCS7
SLFN12
AP3M2
APOE
alas2
FRS2
ST8SIA4
TMEM255A
PREP
BCL2
TMEM156
FCN1
TNXB
A4GALT
THRB
TACR1
RHBDF1
PCDH18
DPYD
USP32
NCAM1
AGT
TM6SF1
SPG20
ZBTB20
GMFB
AHR
ATP6V1C1
SORBS2
MILR1
SFRP2
CRABP1
OMD
OAS1
SLA
CPVL
FAM177A1
RAB20
TNNT2
PHGDH
HCAR2
APOBEC3A
OLR1
DAGLB
MAP4K3
GABRE
MICA
NT5E
IL18
IGFBP2
FAM180B
ar
TMOD2
CLIC5
ZNF536
NRXN1
MRPS18C
GPD1L
GBP4
PKP2
MMP1
CA12
IL18RAP
ZNF846
SLC22A3
cyfip2
abca2
SLCO1C1
ABCD3
PARVG
IDO1
FOXP2
hla-dra
NRN1
KIAA0408
OGN
znf347
DUSP3
CXCR1
CCDC3
SP110
snca
FAM171B
CHD7
C5orf51
Mt1m
TREM2
THSD7A
CXCL2
Ly6k
SLC10A6
PAPOLG
arhgap15
RMDN1
STAB1
GIMAP4
SLITRK3
RNF152
CNTN1
MEOX2
KLF5
PDE5A
MYOC
TNFRSF21
SPATA18
ELMO1
LRRCC1
SCIMP
GAL3ST4
PDZD2
ID2
GRIK3
CLCN3
RHOJ
LRP12
SCN7A
CXCL10
KIF1A
VCAN
HERC5
NCK1
SBSPON
PDGFRA
PTPRJ
FPR2
KLHL5
FAM46C
CPE
RAB10
DCN
SUCLG2
S100A12
CX3CR1
KCTD3
PLP1
NXPE3
BNC2
XKR4
STMN2
PCOLCE2
HEXA
cenpv
FBXO2
SERPINA5
PHF11
GULP1
ARSJ
C1orf162
RBM48
COL12A1
PNP
RAP1GDS1
UBTFL1
HSPB8
fam21a
MBNL2
KLK6
ZNF385D
MTM1
ECHDC1
CD4
MFSD6
PLIN4
GPR83
PTPN12
CRYZL1
PTPRZ1
ABHD4
SHISA3
USP17L6P
SLC16A7
ITGB4
SYT10
KATNAL1
TBC1D5
DEFB128
LOC101060256
BTN3A2
ALDH4A1
CRYAB
ARFGEF3
JAKMIP2
CD36
SOS2
GALNT5
hps5
LIPE
LY86
ZMYND8
PRMT2
EPHA5
PRRG4
MERTK
CORO2B
CCL7
ANTXR2
IL1RL1
MID1
GABRG1
RASEF
TSHZ2
MCEMP1
CNR1
MS4A6A
CYP4V2
folh1
CHL1
TTLL7
SPOCK3
ANK2
VLDLR
SLC1A2
PDGFB
LGALS3BP
HPS3
SAMD9L
KIF21A
ADAMTS4
SLIT3
GRIN2B
IL34
MYH11
EBF3
GPRC5A
PAK3
TGFBR1
GBP2
SFMBT2
ACVR1C
EBF1
SNX2
ATP1B2
TSNAX
SEMA7A
PCID2
WBSCR17
arfip1
prok2
USP53
PRUNE2
DOK6
G0S2
PER3
ADCY8
C10orf10
ARMC10
PBOV1
GREM1
PLOD3
MFSD1
MAP4K5
TSPAN5
EHBP1
OSGIN2
IL6
CPED1
FBXL2
STATH
LYPD1
RNF213
SLC7A2
L1CAM
GFRA3
PPT2
CD163
GIMAP2
DPT
PRKAR2B
NIPSNAP3A
GPR65
LATS2
CMTM2
EZH1
LRRTM4
gbp1
MAOB
BST2
c8orf4
ALLC
CDO1
IFI6
FAM198B
GPR183
ANOS1
COL28A1
ANKFN1
DENND1B
SLITRK5
IL1R2
Fcgr2b
HTT
CCDC53
CYB5R1
KDM4C
ERBB3
ZKSCAN8
SYK
IFI44L
PMP2
WIPI1
CYP27A1
CCDC80
ATG4C
ENDOD1
LGI1
ARAP2
CAV1
ALDH1A1
DGAT2
TM2D2
PRSS23
ABCB4
SETDB2
RABEP1
C1QB
LOXL3
RTP4
ST14
MLLT10
EIF2AK4
IFI35
LMO3
C11orf24
TMOD1
GLRB
HLA-DMA
PPP2R2B
NRCAM
DDX58
ENPP6
COL6A3
RRM2B
FAM107A
PON2
POP5
ARSE
ACOT4
STMN4
SGCE
SAMD9
adamts12
AKR1C3
ADAM22
PYGM
PRICKLE1
GPC6
CDKN2A
RELN
RASGRF2
CSF1R
AOAH
ARHGEF10
DAAM1
SELENBP1
MBOAT2
GPAT3
SKA2
TCEAL1
C6
PTGIS
KRT23
S100A9
KCTD1
slc35a1
ADAM12
FAM214A
FRAS1
PPP1R14A
SP140L
C1orf27
AATK
NSMCE2
TTC37
YEATS4
PCOLCE
B4GALNT1
PAPSS2
UTRN
SDAD1
ADGRE3
CEP170
FRMD5
BTN3A1
PPM1K
ALCAM
GPD1
ADAM19
kcnj16
FYB
CHI3L1
RARB
DRAM2
SLAIN1
lgals9
VAMP4
NEK6
PRRX1
ASAP2
BMP6
PPP1R1B
VIT
ZFPM2
SLC35F1
NTM
GLDN
EGF
BRCC3
SNX13
THY1
WBP11
TEX2
TMEM176A
FCGR3A
CD200
ITGA6
CCND1
MSR1
RRAS
TOX
FMOD
ADCK2
EPSTI1
GNG2
TPD52L1
BIRC2
NLGN3
PDK4
SLC2A1
SSFA2
BCL2A1
PSG7
PRDM1
c5orf15
IGSF21
B3GALT2
CD14
ABCC9
FAM63A
INPP5F
MYBL1
BLNK
MCCC1
GPC4
BPGM
masp1
FAM126A
CGNL1
TRPM7
CECR1
PPIH
CRABP2
MPZ
CTNS
PLCB4
MS4A4A
ADAM28
tspan15
PRIMA1
TLR7
CCPG1
SORCS3
PDGFA
TENM3
HLA-DPB1
arhgap18
EVI2B
NCKAP1L
ADORA3
AFDN
ZCCHC17
Ccl4l2
FUCA1
MFAP2
MPP5
SELENOI
MRPS36
CCDC184
RB1
adamts1
SAA1
ALG8
ST3GAL4
HTR1D
c9orf64
KRT19
COL4A1
STS
FFAR2
GAGE12F
ENTPD1
MX1
SPANXB1
UPRT
ADAM17
ALG5
NRXN3
PREPL
FCGR1A
IFIH1
AZI2
BOC
ARHGDIG
MANBA
GFRA1
eif2ak2
SOBP
CERS6
PLPPR4
POLR3GL
ERRFI1
TLR2
LRAT
TRMT1L
GLB1
PARP9
HSPA12A
SATB1
CYP1B1
CERS4
IFIT3
RRN3
RYR3
XPNPEP2
SLC5A11
VAMP8
EHF
FRMD3
RFX5
AK3
RAB3C
TRIM22
RNASE6
zrsr2
SLC44A2
UCHL1
DPP4
IKZF1
KCNA2
SLC16A12
CACHD1
LILRB4
YEATS2
ABCA1
THBS3
C3AR1
CADM2
USP24
BDKRB2
DCLK1
MEF2A
RAI14
SGCB
MOG
ERAP1
APLNR
TANC1
PAPPA
TNNC1
AKR1C2
HLA-DQB1
AOC3
SLC27A1
OAS3
FBLN1
PRKAB2
INF2
SLC16A9
HLA-DPA1
ST8SIA1
CD248
LMBRD2
ITGAV
AVPI1
KIF5A
MYO5A
IRAK3
ADAM10
GALC
CIDEC
WDR49
VSIG4
DIRAS2
KIAA2026
GBA
UBXN2B
cyp2u1
ERICH3
SLC24A2
NEDD1
THRSP
NTRK3
FMO1
SNX14
BEX4
RAB31
CTNNA3
NIM1K
LAMC1
ZNF521
ANGPT1
TAGLN
GPR82
KCNK2
LGALS16
SORCS1
DNM3
MOXD1
FAM13C
PDGFRL
lpar6
TNC
PTPRD
CYP4X1
SHISA6
PLK2
LYRM9
ATP1A2
AFAP1L2
RBP4
SP100
st6gal1
LAMB1
EPB41L2
ACKR1
FMNL3
LRCH2
CYP4Z1
ANKRD30B
IFIT5
CDH1
OSR1
IFIT1
FNDC5
SCN2A
GNPTAB
TROVE2
KHDRBS3
MICAL2
COL14A1
ANKRD50
NEXN
SCRN3
C19orf33
BICC1
PTCHD4
SEMA3D
NIPAL3
TGFA
PADI2
INMT
ddr1
DKK1
2021-03-01
OLFML2B
FAM189A2
INPP5D
dnase2
TSPAN1
RGS9
NMI
AAED1
DEPTOR
Eppin
PPFIBP2
VCAM1
CYTH3
NCALD
HHIP
ADH1B
LAPTM5
CAB39L
FSTL3
RTKN
TJP2
CNP
TLL1
RFX4
PDZD4
PLAC8
ATP6V1D
RNF157
PMEPA1
CHN1
VPS13C
SLC14A1
UAP1
KCNJ15
TULP3
APBB1IP
CXCL16
ZNF845
SNAI2
C3orf38
GPR39
FAM180A
FCHO2
FXYD3
PRDM7
NDRG3
SEMA3C
GRAMD3
ZNF383
PDGFC
IFI44
DACT1
hcar3
PTCH2
PIK3IP1
SLC39A6
B, Differentially expressed genes identified from GSE39645 and GSE56597 datasets (n=111)
Gene names
SCRN1
PSMA5
ARHGDIB
AXL
TMEM50B
PSMD10
BHLHE40
PLXNB2
GNG7
AZIN1
CLIP3
TMEM230
PPT1
TCEAL9
CREBL2
SERPINE2
SECISBP2L
RNF130
SMIM15
FADS1
c6orf62
NEFL
XPOT
GAL3ST1
INTS12
STAT1
VPS35
EMC2
CD74
ERGIC2
SLC30A9
VPS26A
CAPZA2
CYFIP1
CAMK2D
ACP2
NAGA
MYOF
AKIP1
NDUFB6
CTSD
CBFB
SCPEP1
RARRES2
APLP2
ZEB2
TMEM30A
LAMA4
FMNL2
TAOK1
GIT2
TTC1
TEAD1
PTCD3
A2M
CDIPT
MED14
C6orf1
CD151
NDRG2
GTF2H5
ASPN
ADAMTS8
ARHGAP5
PLA2G16
ZNF22
RAP1A
ARHGEF12
DCBLD2
FRMD6
UBA3
STX7
ZSWIM6
AIF1
IVD
BBS2
DDIT4
EAPP
SLC35E3
PLEKHA4
GNPAT
SLFN5
TLN1
RNF14
TSC22D1
BLOC1S2
NDUFA2
GALNT2
CCL4
EIF5B
YAE1D1
PARP12
GTF2A2
ARPC1B
ERLIN1
ZNF106
ARL8B
SOS1
MAN2A2
PCMT1
TSC22D3
BNIP2
CIR1
ITGB1BP1
FNDC3A
MAP1B
STAT2
RGS10
ANXA4
HCLS1
C, Differentially expressed genes identified from GSE39645 and GSE54934 datasets (n=13)
Gene names
DEFA1B
CNTNAP3B
HLA-DRB3
HEPN1
CT45A5
SSX2B
USP17L3
COMMD3-BMI1
IKZF5
HBG2
TRIM49B
DEFB4B
LY75-CD302
D, Differentially expressed genes identified from GSE54934 and GSE56597 datasets (n=1,483)
Gene names
C10orf90
XDH
EDN1
CLK4
cdh24
TMC4
KCNA6
ZG16
FAT4
CABS1
SEMA4D
NOSTRIN
AFDN-AS1
SLC22A2
FAHD1
USP6NL
CD160
ZNF83
CST7
LGI2
CNGA3
NEFH
TNNT3
LINC00597
FPGT
CETN3
WBP4
MMP16
IL24
BDKRB1
PDZD3
Hist1h1a
OR4D10
PTPN5
SLITRK4
LAMB4
CGA
LINC00272
CDH8
ADRA1A
DEFB125
OR2T29
SCN11A
RPL4
SYTL5
CLCA1
PLSCR4
GTSF1
FETUB
CADPS2
GRHL1
Krtap6-2
STOML3
CMA1
ABCC12
LDLR
KIF4A
ZMYM5
SNCAIP
LOC645261
LGR5
JAK2
SIRPG
osr2
LRP1B
TMEM244
ENKUR
KALRN
CCDC60
SECTM1
C6orf141
B3GALT5-AS1
NUP133
IL20RA
GCM1
FMO9P
CLEC4M
CLDN10
TAC1
GYPA
osbpl6
pcsk1
SDK2
TDRD9
DDIT4L
MME
MAST4
PIH1D3
MALL
VPS50
SLC14A2
LRRFIP1
Tpsab1
dchs2
SFTPA1
GRID1
CR1
CCDC129
GRAMD1C
SERPINB11
ITGA10
ACSM6
HORMAD2
CACNA1C
ALDH1L1
CCL23
CFAP47
PRAMEF14
LPAR3
LMNB1
PNPLA3
PTGER2
FAM153B
ADAM29
TSKU
KLK7
SAMHD1
SLC17A6
ITGBL1
NETO1
NBEA
FMO6P
CFAP54
NEO1
fcrl2
TMPRSS3
gh2
MIR99AHG
PALMD
ENPEP
GABRP
NRG3
PTPRG
MC2R
SNORD116-24
MOBP
WISP1
P2RX1
BPIFA3
CCDC173
HIP1R
COL4A6
PLG
DNAH8
ICAM3
CNTNAP5
LRRIQ1
PTGFRN
LRRN4CL
TGM4
ERMN
EXO1
SLC2A2
SOSTDC1
DOK5
ADCY4
OTC
ABCB11
TMIE
CCBE1
SMARCAD1
LMCD1
WFDC10B
GPR63
ATRNL1
CHRM3
MARCO
LY9
NLRP12
TLE4
SH3GL2
DNTT
TIMP4
MAJIN
FBXO39
STAB2
CDC20B
SLC26A7
CLEC9A
GLP2R
kng1
SYT4
GGT5
NEK2
SIGLECL1
VWA3B
NRXN2
DNASE2B
ALPK2
AFF3
MYB
TBC1D19
SLC6A2
ATRX
MPPED2
SEMG1
PPIAL4A
TRAF3IP2
WNK2
ATXN7L1
NBEAL1
CLGN
OR10G9
c10orf107
MUSK
BPIFA2
KCNIP3
SLC39A14
RGS16
OR4C46
CA14
MRVI1
MEPE
GALNT13
CACNA1E
FBLIM1
TMC2
DBX2
slc39a8
ZNF117
CCSER1
TNFSF15
HSD17B11
KIF18B
GRK3
POTEE
FAM135A
C3orf20
GAGE13
RD3
ARMC8
SLC7A14
LDAH
ENAH
KIR3DL2
C3orf33
CNGA1
ABCB1
ABCD2
CLEC4C
TMEM132C
AKAP10
RPAP3
MAPRE3
ARPP19
ELN
CHIAP2
CLUL1
RHAG
CPN1
NLRP7
AMPD1
DPYSL5
SEZ6L2
DGKB
TGM3
TICRR
EREG
CDCA7
CAMP
GRHL3
GABRA2
GOLGA5
FXYD4
NEXN-AS1
TMEM40
BRINP1
KERA
LINC00158
FRMPD2
ARRDC4
C1orf140
PLEKHF2
HOXA7
POLQ
SLITRK6
KRTAP21-2
ZNF260
FGF14
DHRS9
CACNA2D3
DGKK
TMEM67
NPY5R
SKA3
OR51L1
ELOVL2-AS1
ARMC3
cyp2b6
SPAG17
MUC19
c2orf76
TMEM155
AQP7P1
CAPN13
UVRAG
ITGA2B
LOC442132
LRRC55
c3p1
HGD
SNORD13P2
TCN1
BEND2
NOD1
INA
DGKI
LPA
AXIN2
DUSP21
ACSM2A
FGA
OTOS
CCL8
CCDC82
LINC01105
SLC43A1
LHFPL1
LDB2
MYRFL
BAG2
PAQR5
LRRC7
GIN1
SLC26A9
NOS3
ADH1A
FCRL4
KCNA5
SERAC1
RIT1
FGD5
NRIP3
TRIM49D2
CXorf36
XG
SYNPR
GLB1L3
ATP13A5
TMEM128
cds1
depdc1b
PPP1R16B
HLA-DRB1
ATP6V0D2
ADPRM
ELF5
DAOA
OVCH1
ORM2
EGLN3
KLK1
KRT5
CDH12
FOXD1
GPRC5B
FRMD7
HSD11B1
KITLG
LHFPL3
krt222
CFP
LINC00238
PRAME
GNGT2
HIP1
RAET1E
ADAMTS5
NOTCH3
B3GALT1
ZFP57
CCDC112
DPP10
SULT1C4
PPP4R4
MAP3K19
OR4F13P
PARM1
ELMOD1
FAM64A
IGF2BP1
ELAVL3
HHATL
UGT3A2
SPOCK1
HPSE2
FAM106A
MUM1L1
KPNA7
baat
RTKN2
NAALAD2
DNAJA1P5
LPO
PEBP4
SH3BP4
RPA4
NWD1
LINC00670
ACSBG2
PALLD
GPC5
USP32P2
CECR2
TEKT1
BIRC5
ITGB1BP2
RASGRF1
SLC6A15
UBR3
DNM1
CARMIL1
AADACL4
SLC7A3
CDH10
MPP4
TBC1D3P5
C1orf168
SSX7
GUCY2C
TMEM200A
SLC17A3
SLAMF1
LIF
ACTC1
GDAP1L1
CLEC3B
SLC35A5
SLC22A16
MIS18BP1
CRP
PLA2R1
MYH13
C1orf141
GTSF1L
MMP27
psg4
LINC01558
SERTAD2
GNAO1
NIPAL4
LAMB3
CCL26
TMEM212
SLC25A18
ADGRG4
PFKFB1
KLHL10
MEIS1
LOC643923
BRINP3
ZNF271P
LRBA
ZNF827
KRT8
OSBPL3
ZNF439
BTNL3
POM121L9P
TRPA1
FAM81B
ACBD7
PTGS2
DMRTC1B
ENTPD2
EFCAB5
FCAR
CST11
ESR1
KCNN3
PLCXD3
DMXL1
ROPN1L
FLJ42393
RASGEF1A
SLC7A11
FHL5
MAIP1
PPM1E
TINAGL1
PGLYRP4
PRM1
[truncated: 9,359 more rows]
